# Supplementary material
Source: Springer Nature journal article supplement (https://www.springerprofessional.de/resource/supplementary/13638_2013_738_MOESM1_ESM.pdf/11898298)

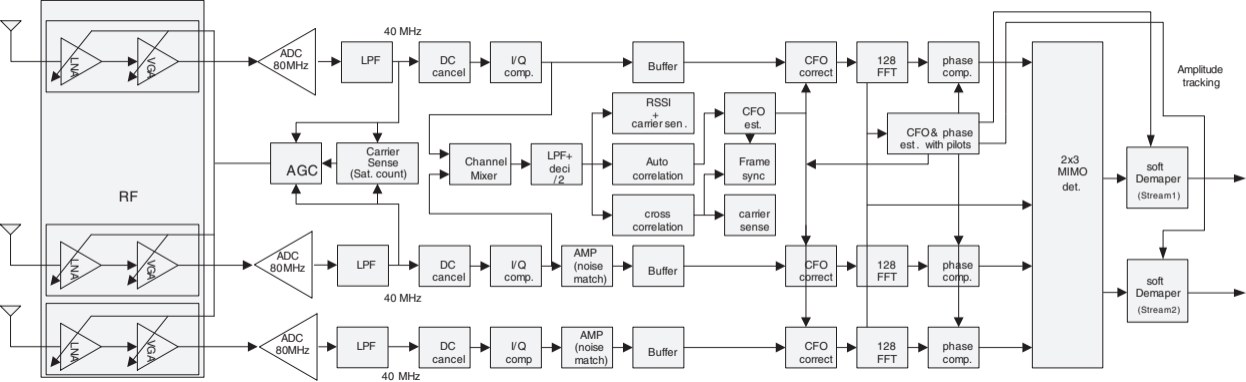

Supplement: MOESM1 [file 11898298]
